# Supplementary material
Source: PubMed Central journal article supplement (PMC3495095)
Supplement: NIHMS396465-supplement-1_si_001.pdf [file NIHMS396465-supplement-1_si_001.pdf]

# Aromatic Interactions as Control Elements in Stereoselective Organic Reactions

Elizabeth H. Krenske\*<sup>†</sup> and K. N. Houk\*<sup>‡</sup>

<sup>†</sup> School of Chemistry, University of Melbourne, VIC 3010, Australia, and Australian Research Council Centre of

Excellence for Free Radical Chemistry and Biotechnology; <sup>‡</sup> Department of Chemistry and Biochemistry,

University of California, Los Angeles, CA 90095, USA

E-mail: ekrenske@unimelb.edu.au, houk@chem.ucla.edu

## SUPPORTING INFORMATION

| <u>Contents</u>                                                                                                          | <u>Page</u> |
|--------------------------------------------------------------------------------------------------------------------------|-------------|
| Table S1. Comparison of Stereoselectivities for Reactions in Schemes 1–7, as Predicted by B3LYP, B3LYP-D3, and M06-2X    | S2          |
| Figure S1. Comparison of stereoselectivities for oxyallyl/furan cycloadditions, predicted by B3LYP, B3LYP-D3, and M06-2X | S3          |
| Geometries and energies of transition states from Table S1                                                               | S4          |
| Citation for Gaussian 09                                                                                                 | S20         |

**Table S1.** Comparison of Stereoselectivities for Reactions in Schemes 1–7, as Predicted by B3LYP, B3LYP-D3, and M06-2X<sup>a</sup>

| Reaction                                                                                                                                                                                                                                                                                                                                                                                                                                                                     | $\Delta\Delta E^\ddagger$ |          |        |     |     |     |    |      |                                          |                    |                   |
|------------------------------------------------------------------------------------------------------------------------------------------------------------------------------------------------------------------------------------------------------------------------------------------------------------------------------------------------------------------------------------------------------------------------------------------------------------------------------|---------------------------|----------|--------|-----|-----|-----|----|------|------------------------------------------|--------------------|-------------------|
|                                                                                                                                                                                                                                                                                                                                                                                                                                                                              | B3LYP                     | B3LYP-D3 | M06-2X |     |     |     |    |      |                                          |                    |                   |
| <b>Sharpless asymmetric dihydroxylation of styrene, catalyzed by (DHQD)<sub>2</sub>PYDZ (Scheme 1)<sup>21,22</sup></b><br>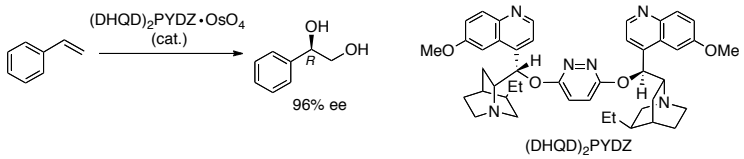                                                                                                                                                                                                                                                                  | 0.9                       | 6.2      | 3.9    |     |     |     |    |      |                                          |                    |                   |
| <b>Ruthenium-catalyzed asymmetric transfer hydrogenation of ketones (Scheme 2)<sup>23–26</sup></b><br>                                                                                                                                                                                                                                                                                      | 2.5                       | 2.6      | 3.3    |     |     |     |    |      |                                          |                    |                   |
| <b>Hetero-Diels–Alder reactions of <i>o</i>-xylenes with benzaldehyde (Scheme 3)<sup>27,28</sup></b><br>                                                                                                                                                                                                                                                                                    | R = TMS 0.6               | 0.1      | 0.7    |     |     |     |    |      |                                          |                    |                   |
| <b>Asymmetric hetero-Diels–Alder reactions of Rawal's diene with aldehydes, catalyzed by a TADDOL derivative (Scheme 4)<sup>29,30</sup></b><br>                                                                                                                                                                                                                                            | 1.5                       | 4.5      | 3.0    |     |     |     |    |      |                                          |                    |                   |
| <b>Enantioselective acyl transfer catalyzed by DHIPs (Scheme 5)<sup>32,33</sup></b><br>                                                                                                                                                                                                                                                                                                   | 2.7                       | 6.8      | 4.2    |     |     |     |    |      |                                          |                    |                   |
| <b>Diastereoselective Diels–Alder reactions of anthracene with aryl-substituted maleic anhydride derivatives (Scheme 6)<sup>34</sup></b><br> <table border="1" data-bbox="568 1407 665 1501"> <thead> <tr> <th>R</th> <th>8:9</th> </tr> </thead> <tbody> <tr> <td>Me</td> <td>1:3</td> </tr> <tr> <td>OMe</td> <td>5:1</td> </tr> <tr> <td>Br</td> <td>17:1</td> </tr> </tbody> </table> | R                         | 8:9      | Me     | 1:3 | OMe | 5:1 | Br | 17:1 | R = Me -1.0<br>R = OMe 1.3<br>R = Br 3.3 | -0.3<br>2.5<br>5.5 | 0.0<br>2.5<br>3.9 |
| R                                                                                                                                                                                                                                                                                                                                                                                                                                                                            | 8:9                       |          |        |     |     |     |    |      |                                          |                    |                   |
| Me                                                                                                                                                                                                                                                                                                                                                                                                                                                                           | 1:3                       |          |        |     |     |     |    |      |                                          |                    |                   |
| OMe                                                                                                                                                                                                                                                                                                                                                                                                                                                                          | 5:1                       |          |        |     |     |     |    |      |                                          |                    |                   |
| Br                                                                                                                                                                                                                                                                                                                                                                                                                                                                           | 17:1                      |          |        |     |     |     |    |      |                                          |                    |                   |
| <b>Enantioselective Claisen rearrangements catalyzed by chiral guanidinium salts (Scheme 7)<sup>36</sup></b><br>                                                                                                                                                                                                                                                                          | 3.0                       | 2.1      | 2.8    |     |     |     |    |      |                                          |                    |                   |

<sup>a</sup> Transition state coordinates were obtained where possible from the publications cited. Where the coordinates had been optimized with a level of theory other than B3LYP/6-31G(d), the geometries were re-optimized at the B3LYP/6-31G(d) level (using the LANL2DZ effective core potential and basis set for Ru and Os). The one exception to this was the catalytic asymmetric hetero-Diels–Alder reaction of Rawal's diene, where transition state geometries were taken directly from the literature and not re-optimized. Subsequent B3LYP-D3 single-point calculations employed the same mixed basis set (LANL2DZ on Ru and Os, 6-31G(d) on other atoms), while M06-2X single-point calculations employed LANL2DZ on Ru and Os and 6-311+G(d,p) on other atoms. B3LYP-D3 calculations employed zero-damping. Predicted stereoselectivities ( $\Delta\Delta E^\ddagger$ ) are given in kcal/mol.

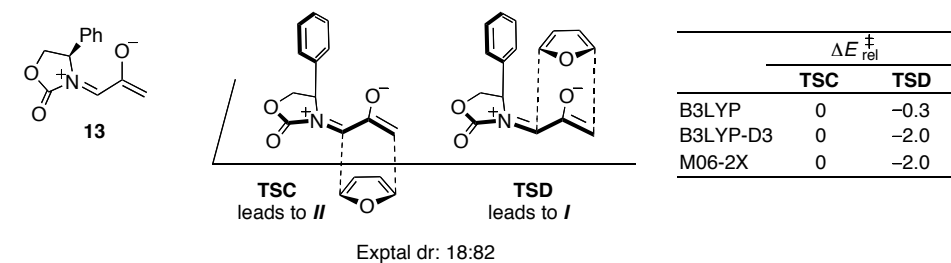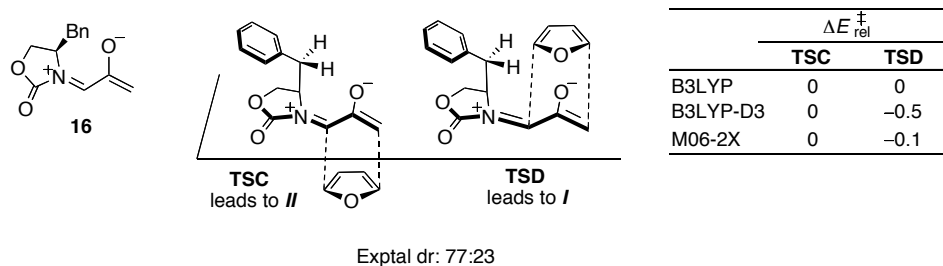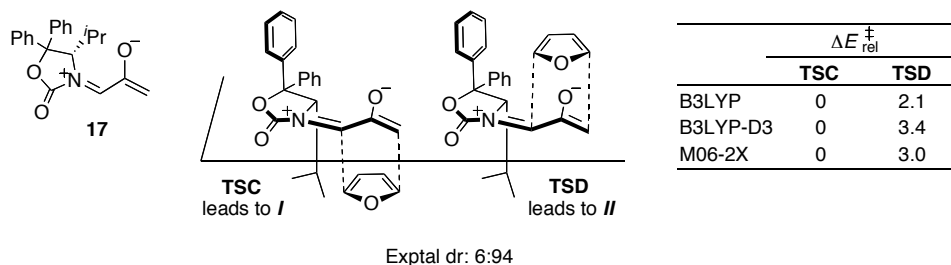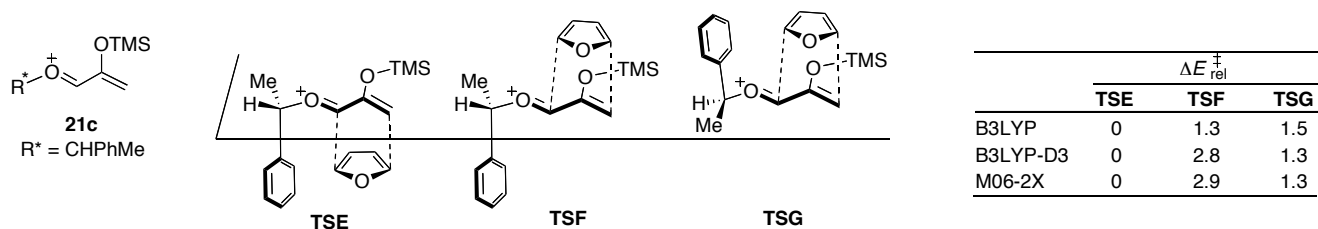

**Figure S1.** Comparison of stereoselectivities for oxyallyl/furan cycloadditions, predicted by B3LYP, B3LYP-D3, and M06-2X. Transition state geometries were optimized at the B3LYP/6-31G(d) level. B3LYP and B3LYP-D3 single-point calculations employed the 6-31G(d) basis set, while M06-2X single-point calculations employed the 6-311+G(d,p) basis set. Predicted stereoselectivities ( $\Delta E_{rel}^{\ddagger}$ ) are given in kcal/mol.

## Geometries and energies of transition states from Table S1

The coordinates of transition states re-optimized with B3LYP are listed below. Below each structure is listed the B3LYP single-point energy ( $E$ ), B3LYP-D3 dispersion energy ( $E_{\text{disp}}$ ), and M06-2X single-point energy ( $E_{\text{M06-2X}}$ ); the basis sets used for these calculations are described in the footnote to Table S1. Energies are given in Hartree. Calculations employed the Gaussian 09 software, the citation for which is given on page S20.

### Sharpless asymmetric dihydroxylation of styrene, catalyzed by (DHQD)<sub>2</sub>PYDZ

#### TS – Favored isomer

|    |           |           |           |
|----|-----------|-----------|-----------|
| C  | -0.428174 | 3.675455  | 1.167034  |
| C  | -0.128928 | 2.858177  | 0.079910  |
| C  | 0.165277  | 3.422999  | -1.177381 |
| C  | 0.163751  | 4.824809  | -1.300217 |
| C  | -0.138455 | 5.638929  | -0.212035 |
| C  | -0.437243 | 5.066761  | 1.026400  |
| C  | 0.482052  | 2.608619  | -2.350691 |
| C  | 0.236890  | 1.246813  | -2.452690 |
| O  | 1.860295  | 0.233742  | -1.732124 |
| Os | 3.382557  | 1.129825  | -1.592067 |
| O  | 3.845892  | 1.538443  | 0.031462  |
| O  | 2.691264  | 2.646308  | -2.164312 |
| O  | 4.531618  | 0.746762  | -2.831753 |
| N  | 4.327128  | -1.098716 | -0.707730 |
| C  | 3.879386  | -1.535149 | 0.664336  |
| C  | 4.441646  | -2.956188 | 0.966904  |
| C  | 5.555274  | -3.283777 | -0.042842 |
| C  | 4.959315  | -3.429163 | -1.462344 |
| C  | 4.092879  | -2.161430 | -1.730222 |
| C  | 6.545787  | -2.106892 | -0.059378 |
| C  | 5.802677  | -0.861821 | -0.616255 |
| C  | 2.366208  | -1.401003 | 0.959696  |
| C  | 2.080658  | -1.632412 | 2.443178  |
| C  | 2.254453  | -0.599860 | 3.420980  |
| C  | 1.988150  | -0.950739 | 4.787873  |
| N  | 1.584577  | -2.188178 | 5.188346  |
| C  | 1.427469  | -3.103233 | 4.254235  |
| C  | 1.662138  | -2.873494 | 2.881697  |
| C  | 2.144829  | 0.040364  | 5.796491  |
| C  | 2.536023  | 1.312702  | 5.481294  |
| C  | 2.792529  | 1.668317  | 4.127713  |
| C  | 2.659476  | 0.731954  | 3.115692  |
| O  | 3.161228  | 2.963603  | 3.956864  |
| C  | 3.414931  | 3.431242  | 2.633425  |
| C  | 4.181999  | -4.736854 | -1.685943 |
| C  | 3.747891  | -4.948029 | -3.142082 |
| O  | 1.666045  | -2.382036 | 0.159930  |
| C  | 0.346665  | -2.203073 | -0.088384 |
| C  | -0.288540 | -3.217172 | -0.845493 |
| C  | -1.622737 | -3.057781 | -1.105731 |
| C  | -2.239600 | -1.889530 | -0.597520 |
| N  | -1.593191 | -0.971503 | 0.096175  |
| N  | -0.281851 | -1.135022 | 0.363986  |
| O  | -3.564017 | -1.747894 | -0.852243 |
| C  | -4.234825 | -0.560988 | -0.365208 |
| C  | -4.010069 | 0.609259  | -1.308708 |
| C  | -4.162352 | 1.953497  | -0.843907 |
| C  | -3.981480 | 3.002545  | -1.801948 |
| N  | -3.678877 | 2.779907  | -3.111702 |
| C  | -3.547088 | 1.526683  | -3.497294 |
| C  | -3.703086 | 0.414048  | -2.639509 |
| C  | -4.123626 | 4.352726  | -1.374831 |

|   |           |           |           |
|---|-----------|-----------|-----------|
| C | -4.428555 | 4.654639  | -0.074676 |
| C | -4.605650 | 3.614054  | 0.877990  |
| C | -4.479893 | 2.289872  | 0.502494  |
| O | -4.898529 | 4.043466  | 2.136638  |
| C | -5.065036 | 3.068884  | 3.156377  |
| C | -5.741891 | -0.867820 | -0.193037 |
| C | -6.401601 | -1.662461 | -1.360639 |
| C | -7.412399 | -2.652570 | -0.741939 |
| C | -6.671817 | -3.723188 | 0.097978  |
| C | -5.747636 | -2.947983 | 1.095530  |
| N | -6.038562 | -1.498781 | 1.114793  |
| C | -7.480073 | -1.319632 | 1.379424  |
| C | -8.348193 | -1.872697 | 0.204564  |
| C | -5.918323 | -4.768000 | -0.740733 |
| C | -5.348956 | -5.923473 | 0.092223  |
| H | 0.278707  | -4.074636 | -1.191827 |
| H | -2.201699 | -3.778469 | -1.673475 |
| H | -3.822773 | -0.329410 | 0.618332  |
| H | -5.904970 | 2.396975  | 2.936297  |
| H | -3.306861 | 1.364292  | -4.547875 |
| H | -3.577005 | -0.589283 | -3.032400 |
| H | -3.979238 | 5.129550  | -2.118694 |
| H | -4.536303 | 5.680278  | 0.263820  |
| H | -5.275914 | 3.625730  | 4.070934  |
| H | -4.154089 | 2.472049  | 3.292552  |
| H | -4.617720 | 1.502686  | 1.232273  |
| H | -6.211599 | 0.120120  | -0.135496 |
| H | -5.652132 | -2.200971 | -1.947253 |
| H | -8.837162 | -1.055431 | -0.340724 |
| H | -7.672047 | -0.253212 | 1.546238  |
| H | -7.707616 | -1.837955 | 2.317735  |
| H | -9.144343 | -2.527297 | 0.579753  |
| H | -4.696658 | -3.077738 | 0.825496  |
| H | -5.865172 | -3.321469 | 2.119042  |
| H | -7.437448 | -4.265986 | 0.673385  |
| H | -6.601037 | -5.176571 | -1.499506 |
| H | -5.102315 | -4.280503 | -1.290950 |
| H | -4.624755 | -5.570407 | 0.836141  |
| H | -6.145442 | -6.450868 | 0.631787  |
| H | -4.837917 | -6.656130 | -0.543070 |
| H | 2.013943  | -0.414444 | 0.663482  |
| H | 2.861273  | 1.015532  | 2.090589  |
| H | 2.523435  | 3.343497  | 2.002420  |
| H | 3.686034  | 4.482924  | 2.741234  |
| H | 4.237175  | 2.881013  | 2.164498  |
| H | 2.656553  | 2.079519  | 6.240234  |
| H | 1.938606  | -0.255049 | 6.820319  |
| H | 1.098818  | -4.087953 | 4.585911  |
| H | 1.500897  | -3.679005 | 2.174196  |
| H | 4.344396  | -0.811269 | 1.339392  |
| H | 5.955328  | 0.018685  | 0.013675  |
| H | 6.138586  | -0.610601 | -1.624329 |
| H | 6.921507  | -1.917951 | 0.953754  |
| H | 7.415437  | -2.341224 | -0.684488 |
| H | 6.064710  | -4.210484 | 0.247799  |
| H | 4.829926  | -2.989617 | 1.990288  |
| H | 3.646955  | -3.704728 | 0.906935  |
| H | 4.323870  | -1.718119 | -2.701835 |
| H | 5.803644  | -3.433970 | -2.168248 |
| H | -7.993725 | -3.136983 | -1.536270 |
| H | -6.913175 | -0.978210 | -2.047521 |
| H | 3.028885  | -2.396192 | -1.712715 |
| H | 4.812792  | -5.581102 | -1.374025 |

|   |           |           |           |
|---|-----------|-----------|-----------|
| H | 3.295972  | -4.757021 | -1.036909 |
| H | 3.215800  | -5.898731 | -3.261441 |
| H | 3.079714  | -4.150102 | -3.487488 |
| H | 4.614524  | -4.966035 | -3.814209 |
| H | 0.303953  | 0.770830  | -3.424181 |
| H | -0.359509 | 0.732208  | -1.710854 |
| H | 0.723291  | 3.154343  | -3.256167 |
| H | 0.398725  | 5.271386  | -2.263210 |
| H | -0.139440 | 6.719339  | -0.329137 |
| H | -0.673438 | 5.699196  | 1.877917  |
| H | -0.653818 | 3.223322  | 2.128919  |
| H | -0.120136 | 1.780269  | 0.212462  |

1 imaginary frequency

E = -3038.935882

E<sub>disp</sub> = -0.203501

E<sub>M06-2X</sub> = -3038.317307

### TS – Disfavored isomer

|    |           |           |           |
|----|-----------|-----------|-----------|
| Os | 3.283303  | 1.478476  | 0.365469  |
| O  | 2.590926  | 2.866368  | 1.200556  |
| O  | 1.830509  | 1.164837  | -0.596638 |
| O  | 4.569698  | 2.198798  | -0.543651 |
| O  | 3.565165  | 0.362514  | 1.667320  |
| N  | 4.213639  | -0.570512 | -0.891309 |
| C  | 5.672860  | -0.596711 | -0.560430 |
| H  | 5.762623  | -0.621751 | 0.529322  |
| H  | 6.087320  | 0.352637  | -0.905306 |
| C  | 6.381891  | -1.807162 | -1.226758 |
| H  | 7.316408  | -1.484665 | -1.700662 |
| H  | 6.646485  | -2.565993 | -0.480187 |
| C  | 3.672050  | -1.928792 | -0.520195 |
| H  | 4.095500  | -2.124606 | 0.468858  |
| C  | 4.208543  | -2.990434 | -1.523425 |
| H  | 4.488904  | -3.900519 | -0.983143 |
| H  | 3.427558  | -3.271906 | -2.235310 |
| C  | 5.421429  | -2.406648 | -2.269809 |
| H  | 5.922613  | -3.191989 | -2.848334 |
| C  | 4.962081  | -1.265412 | -3.206166 |
| C  | 4.075608  | -0.307647 | -2.356047 |
| H  | 3.019930  | -0.421172 | -2.602603 |
| H  | 4.350248  | 0.737731  | -2.516464 |
| H  | 5.865361  | -0.722406 | -3.523034 |
| C  | 4.254897  | -1.743065 | -4.485445 |
| H  | 3.316425  | -2.250929 | -4.223841 |
| H  | 4.886040  | -2.495327 | -4.978990 |
| C  | 3.958271  | -0.610342 | -5.476488 |
| H  | 3.473702  | -0.994100 | -6.381434 |
| H  | 4.880849  | -0.102540 | -5.783250 |
| H  | 3.294413  | 0.146762  | -5.042160 |
| C  | 2.145153  | -2.013923 | -0.292087 |
| H  | 1.823368  | -1.213441 | 0.372407  |
| O  | 1.483620  | -1.827441 | -1.564439 |
| C  | 0.188551  | -1.426679 | -1.557561 |
| N  | -0.443844 | -1.251349 | -0.413120 |
| N  | -1.724996 | -0.838880 | -0.416852 |
| C  | -2.342564 | -0.631291 | -1.564914 |
| C  | -1.722982 | -0.809426 | -2.824498 |
| C  | -0.415532 | -1.218196 | -2.820161 |
| H  | -2.278405 | -0.624622 | -3.737951 |
| H  | 0.151138  | -1.381723 | -3.730750 |
| C  | 1.768022  | -3.365818 | 0.310989  |
| C  | 1.310356  | -4.386139 | -0.498981 |

|   |           |           |           |
|---|-----------|-----------|-----------|
| C | 0.998946  | -5.647475 | 0.052929  |
| N | 1.119625  | -5.939826 | 1.331579  |
| C | 1.560411  | -4.951434 | 2.158587  |
| C | 1.679508  | -5.261914 | 3.542008  |
| C | 2.102853  | -4.322945 | 4.442839  |
| C | 2.430946  | -3.009525 | 4.005927  |
| C | 2.338492  | -2.668404 | 2.667466  |
| C | 1.901415  | -3.630563 | 1.711994  |
| H | 1.178691  | -4.224424 | -1.562981 |
| H | 0.639125  | -6.444388 | -0.597603 |
| H | 1.417579  | -6.269034 | 3.850444  |
| H | 2.193454  | -4.545130 | 5.501568  |
| O | 2.822460  | -2.173160 | 5.002678  |
| C | 3.145759  | -0.826771 | 4.669317  |
| H | 3.413327  | -0.345599 | 5.611676  |
| H | 3.989566  | -0.776068 | 3.972801  |
| H | 2.289512  | -0.309795 | 4.220297  |
| H | 2.590835  | -1.665512 | 2.347752  |
| O | -3.639489 | -0.231941 | -1.575991 |
| C | -4.309627 | -0.066275 | -0.302887 |
| H | -3.977705 | -0.874907 | 0.350247  |
| C | -3.960424 | 1.276405  | 0.319193  |
| C | -3.577477 | 2.349528  | -0.458727 |
| C | -3.294788 | 3.595655  | 0.145871  |
| N | -3.375390 | 3.821005  | 1.441943  |
| C | -3.756661 | 2.780197  | 2.235015  |
| C | -4.065759 | 1.474857  | 1.732190  |
| C | -4.454762 | 0.454066  | 2.645072  |
| C | -4.528089 | 0.720829  | 3.999432  |
| C | -4.224062 | 2.018048  | 4.496823  |
| C | -3.848482 | 3.014508  | 3.635880  |
| H | -3.610270 | 4.011749  | 3.992049  |
| H | -4.295418 | 2.183849  | 5.567212  |
| O | -4.881128 | -0.181869 | 4.954848  |
| C | -5.165477 | -1.513425 | 4.549074  |
| H | -6.025709 | -1.549592 | 3.867780  |
| H | -5.403517 | -2.059840 | 5.463156  |
| H | -4.298856 | -1.976482 | 4.060406  |
| H | -4.687422 | -0.535299 | 2.273469  |
| H | -3.482768 | 2.240598  | -1.533943 |
| H | -2.988668 | 4.436842  | -0.475189 |
| C | -5.834400 | -0.215538 | -0.511585 |
| H | -6.268171 | 0.183473  | 0.412393  |
| C | -6.426281 | 0.573936  | -1.717371 |
| H | -6.831683 | 1.535897  | -1.383210 |
| H | -5.656953 | 0.794841  | -2.463189 |
| C | -6.047912 | -2.235244 | -1.876954 |
| N | -6.263526 | -1.634092 | -0.543693 |
| C | -7.710488 | -1.666381 | -0.251664 |
| H | -7.861069 | -1.374280 | 0.794192  |
| H | -8.040183 | -2.707233 | -0.345228 |
| C | -8.506794 | -0.734232 | -1.219332 |
| H | -8.893036 | 0.145187  | -0.688356 |
| H | -9.372881 | -1.257600 | -1.642663 |
| C | -7.543607 | -0.292320 | -2.340656 |
| H | -4.989474 | -2.129740 | -2.125625 |
| H | -6.254710 | -3.308123 | -1.792526 |
| C | -6.939708 | -1.569272 | -2.976829 |
| H | -7.780632 | -2.241424 | -3.207703 |
| H | -8.084093 | 0.285238  | -3.100714 |
| C | -6.190758 | -1.321756 | -4.295905 |
| H | -5.305431 | -0.699739 | -4.107064 |
| H | -6.836737 | -0.742154 | -4.970659 |

|   |           |           |           |
|---|-----------|-----------|-----------|
| C | -5.760082 | -2.613120 | -5.003410 |
| H | -6.627112 | -3.243148 | -5.237466 |
| H | -5.078413 | -3.207746 | -4.383594 |
| H | -5.244209 | -2.396036 | -5.945910 |
| C | 0.204539  | 2.360604  | -0.263405 |
| C | 0.592894  | 3.479173  | 0.457982  |
| H | 0.074140  | 2.414913  | -1.337471 |
| C | 0.994060  | 4.755192  | -0.137240 |
| H | -0.317103 | 1.553836  | 0.235752  |
| H | 0.361023  | 3.502958  | 1.517197  |
| C | 0.928691  | 5.924944  | 0.641217  |
| C | 1.280654  | 7.161545  | 0.105900  |
| C | 1.717759  | 7.252622  | -1.217112 |
| C | 1.802321  | 6.096812  | -1.999104 |
| C | 1.444983  | 4.861467  | -1.467139 |
| H | 0.588434  | 5.856243  | 1.671285  |
| H | 1.216126  | 8.054306  | 0.721988  |
| H | 1.997209  | 8.215811  | -1.635333 |
| H | 2.154202  | 6.159168  | -3.025436 |
| H | 1.531506  | 3.968918  | -2.080425 |

1 imaginary frequency

E = -3038.934524

E<sub>disp</sub> = -0.194968

E<sub>M06-2X</sub> = -3038.311094

## Ruthenium-catalyzed asymmetric transfer hydrogenation of ketones

### TS – Favored isomer

|    |           |           |           |
|----|-----------|-----------|-----------|
| C  | -3.190179 | -1.645830 | -0.513206 |
| C  | -2.837953 | -1.270879 | -1.831667 |
| C  | -1.711468 | -1.885352 | -2.440390 |
| C  | -1.006657 | -2.938635 | -1.774374 |
| C  | -1.450081 | -3.375265 | -0.487170 |
| C  | -2.534247 | -2.736552 | 0.145697  |
| Ru | -0.978232 | -1.173448 | -0.478175 |
| O  | 0.655026  | -1.439198 | 0.629267  |
| C  | 1.554983  | -0.354195 | 0.654051  |
| C  | 1.593979  | 0.238470  | -0.776640 |
| N  | 0.156360  | 0.443286  | -1.127204 |
| O  | -0.914078 | 2.196770  | 0.273507  |
| C  | -1.604188 | 1.409902  | 1.114839  |
| H  | 0.081964  | 0.656533  | -2.123272 |
| H  | 1.985061  | -0.555280 | -1.428816 |
| C  | 2.459695  | 1.471114  | -0.963234 |
| C  | 2.916327  | -0.818638 | 1.144673  |
| H  | 1.194628  | 0.445943  | 1.324019  |
| H  | -0.133739 | -3.388850 | -2.233013 |
| H  | -1.358860 | -1.533658 | -3.404975 |
| H  | -3.334639 | -0.433564 | -2.307749 |
| H  | -3.952154 | -1.083677 | 0.015973  |
| H  | -2.807332 | -2.999748 | 1.160814  |
| H  | -0.873172 | -4.120123 | 0.050463  |
| H  | -1.446904 | 0.267378  | 0.830505  |
| H  | -0.333553 | 1.391727  | -0.508597 |
| H  | -1.227602 | 1.408016  | 2.157927  |
| C  | -3.116142 | 1.585163  | 1.112229  |
| C  | 3.404955  | -2.081604 | 0.787938  |
| C  | 4.664429  | -2.502628 | 1.214619  |
| C  | 5.454106  | -1.665784 | 2.006520  |
| C  | 4.972845  | -0.407503 | 2.371285  |
| C  | 3.711030  | 0.010046  | 1.944844  |
| H  | 2.776885  | -2.735894 | 0.191506  |



|   |           |           |           |
|---|-----------|-----------|-----------|
| H | 5.028910  | -3.488026 | 0.933835  |
| H | 6.434400  | -1.994840 | 2.341985  |
| H | 5.576793  | 0.248859  | 2.992762  |
| H | 3.340228  | 0.990793  | 2.232727  |
| C | 2.126037  | 2.710918  | -0.393580 |
| C | 2.966104  | 3.811731  | -0.566731 |
| C | 4.147883  | 3.696373  | -1.301912 |
| C | 4.486833  | 2.468203  | -1.870609 |
| C | 3.646300  | 1.367356  | -1.702209 |
| H | 1.199213  | 2.815427  | 0.164305  |
| H | 2.692365  | 4.766416  | -0.124458 |
| H | 4.797842  | 4.557831  | -1.432888 |
| H | 5.403409  | 2.365193  | -2.445951 |
| H | 3.919463  | 0.410485  | -2.141936 |
| C | -3.912885 | 0.960148  | 2.080760  |
| C | -5.301309 | 1.103106  | 2.060554  |
| C | -5.909972 | 1.880697  | 1.070613  |
| C | -5.119721 | 2.516090  | 0.110149  |
| C | -3.731085 | 2.369212  | 0.131484  |
| H | -3.439984 | 0.362643  | 2.859261  |
| H | -5.907947 | 0.617163  | 2.821051  |
| H | -6.990532 | 1.998063  | 1.056349  |
| H | -5.586299 | 3.134881  | -0.652914 |
| H | -3.096047 | 2.870433  | -0.592174 |

l imaginary frequency

E = -1344.193980

E<sub>disp</sub> = -0.070320

E<sub>M06-2X</sub> = -1343.873127

### TS – Disfavored isomer

|    |           |           |           |
|----|-----------|-----------|-----------|
| C  | -4.111729 | -0.795331 | -0.456974 |
| C  | -3.637303 | -1.813876 | -1.312936 |
| C  | -2.837302 | -2.854584 | -0.762664 |
| C  | -2.607233 | -2.926523 | 0.646086  |
| C  | -3.192713 | -1.945991 | 1.508996  |
| C  | -3.930682 | -0.879969 | 0.965635  |
| Ru | -1.885857 | -0.986931 | -0.070838 |
| O  | -0.404842 | -0.657441 | 1.216199  |
| C  | 0.824168  | -0.273814 | 0.637388  |
| C  | 0.997664  | -1.116673 | -0.651102 |
| N  | -0.282651 | -0.915630 | -1.390386 |
| O  | -0.630980 | 1.416890  | -2.182150 |
| C  | -1.517257 | 1.825563  | -1.261077 |
| H  | -0.329933 | -1.578604 | -2.166242 |
| H  | 1.034079  | -2.166693 | -0.327570 |
| C  | 2.240090  | -0.838996 | -1.477969 |
| C  | 1.952794  | -0.473365 | 1.633828  |
| H  | 0.804561  | 0.785912  | 0.332973  |
| H  | -1.977306 | -3.707258 | 1.056901  |
| H  | -2.373767 | -3.585097 | -1.418233 |
| H  | -3.769506 | -1.731498 | -2.385759 |
| H  | -4.610188 | 0.070136  | -0.880291 |
| H  | -4.286988 | -0.080661 | 1.605091  |
| H  | -2.960330 | -1.959600 | 2.568280  |
| H  | -1.723233 | 0.958352  | -0.470803 |
| H  | -0.383905 | 0.219238  | -1.872672 |
| C  | -1.124796 | 3.021264  | -0.404700 |
| H  | -2.543207 | 1.982154  | -1.656604 |
| C  | 1.953857  | -1.579097 | 2.493250  |
| C  | 3.003634  | -1.782006 | 3.388958  |
| C  | 4.068491  | -0.879365 | 3.438900  |
| C  | 4.072368  | 0.228798  | 2.590321  |

|   |           |           |           |
|---|-----------|-----------|-----------|
| C | 3.019252  | 0.430380  | 1.696677  |
| H | 1.111900  | -2.263943 | 2.465912  |
| H | 2.988896  | -2.642775 | 4.053479  |
| H | 4.885735  | -1.035249 | 4.138650  |
| H | 4.892803  | 0.941113  | 2.626762  |
| H | 3.023461  | 1.297681  | 1.041085  |
| C | 2.381829  | 0.326640  | -2.247658 |
| C | 3.550870  | 0.551470  | -2.976158 |
| C | 4.594992  | -0.375052 | -2.947398 |
| C | 4.462858  | -1.536110 | -2.184659 |
| C | 3.292918  | -1.764428 | -1.459859 |
| H | 1.568975  | 1.045636  | -2.289117 |
| H | 3.643258  | 1.456256  | -3.571824 |
| H | 5.502864  | -0.195365 | -3.517599 |
| H | 5.267650  | -2.266266 | -2.155098 |
| H | 3.198224  | -2.668567 | -0.862543 |
| C | -2.011999 | 3.530187  | 0.552571  |
| C | -1.666327 | 4.634587  | 1.329208  |
| C | -0.424488 | 5.251483  | 1.152297  |
| C | 0.460940  | 4.755770  | 0.194368  |
| C | 0.112838  | 3.646475  | -0.579473 |
| H | -2.982619 | 3.054966  | 0.690613  |
| H | -2.363374 | 5.016109  | 2.071364  |
| H | -0.152609 | 6.113704  | 1.755786  |
| H | 1.425039  | 5.236291  | 0.045844  |
| H | 0.785980  | 3.258180  | -1.336321 |

l imaginary frequency

E = -1344.190018

E<sub>disp</sub> = -0.070139

E<sub>M06-2X</sub> = -1343.867832

## Hetero-Diels–Alder reactions of o-xylylenes with benzaldehyde

### TS – Favored isomer

|   |           |           |           |
|---|-----------|-----------|-----------|
| C | 1.788243  | -0.702931 | 0.734156  |
| C | 0.958977  | 0.057512  | 1.568833  |
| C | -0.477879 | -0.007146 | 1.418434  |
| C | -1.078619 | -0.753774 | 0.381066  |
| O | 1.060930  | 0.009669  | -1.237682 |
| C | -0.188680 | 0.235753  | -1.347522 |
| O | 3.101262  | -0.499359 | 0.705947  |
| H | 1.439999  | -1.622738 | 0.281802  |
| O | -2.448775 | -0.736315 | 0.270115  |
| H | -0.598290 | -1.663036 | 0.027244  |
| C | 1.525059  | 0.982693  | 2.500524  |
| C | -1.267319 | 0.856810  | 2.239876  |
| H | -0.799605 | -0.461283 | -1.946931 |
| C | -0.735893 | 1.616919  | -1.286127 |
| C | -2.041947 | 1.885742  | -1.721629 |
| C | -2.551684 | 3.182675  | -1.678971 |
| C | -1.759401 | 4.230336  | -1.203398 |
| C | -0.454852 | 3.971628  | -0.773005 |
| C | 0.054988  | 2.675990  | -0.816154 |
| H | -2.654787 | 1.072592  | -2.102775 |
| H | -3.564691 | 3.378298  | -2.022138 |
| H | -2.154054 | 5.242831  | -1.173820 |
| H | 0.167336  | 4.785106  | -0.407699 |
| H | 1.069525  | 2.462890  | -0.495518 |
| C | -0.686889 | 1.696914  | 3.155520  |
| H | -2.344127 | 0.824374  | 2.121636  |
| H | -1.315034 | 2.323484  | 3.783935  |
| C | 0.727671  | 1.765256  | 3.292599  |

|    |           |           |           |
|----|-----------|-----------|-----------|
| H  | 2.605896  | 1.022988  | 2.584006  |
| H  | 1.169016  | 2.438878  | 4.021773  |
| Si | 4.179777  | -0.953256 | -0.556941 |
| C  | 5.769873  | -1.380611 | 0.350401  |
| C  | 3.464559  | -2.429800 | -1.475243 |
| C  | 4.387808  | 0.535627  | -1.677491 |
| H  | 6.569302  | -1.628404 | -0.358808 |
| H  | 6.116027  | -0.536762 | 0.958227  |
| H  | 5.635571  | -2.240388 | 1.016615  |
| H  | 4.140028  | -2.738861 | -2.282411 |
| H  | 3.315460  | -3.297478 | -0.821416 |
| H  | 2.503725  | -2.156371 | -1.923837 |
| H  | 4.810804  | 1.388171  | -1.133736 |
| H  | 5.053530  | 0.310651  | -2.520271 |
| H  | 3.409990  | 0.830883  | -2.070954 |
| Si | -3.439033 | -2.057620 | -0.097668 |
| C  | -5.173600 | -1.340589 | -0.157570 |
| C  | -2.946998 | -2.791713 | -1.765705 |
| C  | -3.274797 | -3.361275 | 1.255821  |
| H  | -5.914317 | -2.115770 | -0.388557 |
| H  | -5.447860 | -0.891108 | 0.803435  |
| H  | -5.253008 | -0.561486 | -0.923958 |
| H  | -3.589610 | -3.645370 | -2.015734 |
| H  | -3.045683 | -2.054600 | -2.570847 |
| H  | -1.911448 | -3.152521 | -1.771764 |
| H  | -3.901470 | -4.235622 | 1.040345  |
| H  | -2.240941 | -3.713441 | 1.353573  |
| H  | -3.580756 | -2.961698 | 2.229550  |

l imaginary frequency

E = -1623.040962

E<sub>disp</sub> = -0.062762

E<sub>M06-2X</sub> = -1622.840321

### TS – Disfavored isomer

|    |           |           |           |
|----|-----------|-----------|-----------|
| C  | 2.013169  | 0.684766  | 0.426014  |
| C  | 1.422015  | 1.819337  | -0.150707 |
| C  | -0.015455 | 1.908271  | -0.267199 |
| C  | -0.864915 | 0.837503  | 0.102214  |
| O  | 1.148126  | -0.874666 | -0.853612 |
| C  | -0.037716 | -0.676609 | -1.277305 |
| O  | 3.324900  | 0.494489  | 0.346696  |
| H  | 1.484910  | 0.082768  | 1.155629  |
| O  | -2.217629 | 0.986273  | -0.076625 |
| H  | -0.579042 | 0.162665  | 0.904829  |
| C  | 2.237807  | 2.838450  | -0.729947 |
| C  | -0.551010 | 3.055919  | -0.932580 |
| C  | -1.094293 | -1.709811 | -1.091812 |
| H  | -0.191706 | -0.032010 | -2.158306 |
| C  | 0.265157  | 4.038275  | -1.434075 |
| H  | -1.628191 | 3.131162  | -1.026557 |
| H  | -0.174312 | 4.909624  | -1.913631 |
| C  | 1.680030  | 3.932289  | -1.338736 |
| H  | 3.314500  | 2.734444  | -0.650080 |
| H  | 2.311405  | 4.716220  | -1.747209 |
| Si | 4.183089  | -0.979359 | 0.569073  |
| C  | 5.830478  | -0.423652 | 1.282951  |
| C  | 3.233785  | -2.070159 | 1.772327  |
| C  | 4.376033  | -1.783427 | -1.113060 |
| H  | 6.505637  | -1.277793 | 1.417275  |
| H  | 6.328418  | 0.290830  | 0.617513  |
| H  | 5.703654  | 0.059250  | 2.258548  |
| H  | 3.775004  | -3.009622 | 1.939192  |

|    |           |           |           |
|----|-----------|-----------|-----------|
| H  | 3.097574  | -1.591240 | 2.749238  |
| H  | 2.248135  | -2.320453 | 1.366335  |
| H  | 4.901413  | -2.743880 | -1.038843 |
| H  | 3.386563  | -1.953199 | -1.548728 |
| H  | 4.943798  | -1.141110 | -1.795920 |
| Si | -3.415741 | 0.863205  | 1.115899  |
| C  | -5.023240 | 0.708286  | 0.156597  |
| C  | -3.116284 | -0.640075 | 2.212739  |
| C  | -3.392551 | 2.435848  | 2.159651  |
| H  | -5.887321 | 0.692560  | 0.831997  |
| H  | -5.154156 | 1.549484  | -0.533727 |
| H  | -5.035148 | -0.215631 | -0.431408 |
| H  | -3.947055 | -0.756808 | 2.920434  |
| H  | -3.042775 | -1.560075 | 1.623177  |
| H  | -2.198891 | -0.546063 | 2.806157  |
| H  | -4.138375 | 2.389414  | 2.963237  |
| H  | -2.412491 | 2.589860  | 2.626940  |
| H  | -3.611214 | 3.321529  | 1.551882  |
| C  | -2.298411 | -1.623128 | -1.807340 |
| C  | -3.277860 | -2.607240 | -1.672621 |
| C  | -3.069429 | -3.692822 | -0.817744 |
| C  | -1.870013 | -3.789594 | -0.104703 |
| C  | -0.889547 | -2.809222 | -0.243847 |
| H  | -2.460090 | -0.779770 | -2.473597 |
| H  | -4.201762 | -2.531616 | -2.240961 |
| H  | -3.829721 | -4.462928 | -0.716444 |
| H  | -1.696060 | -4.639150 | 0.551390  |
| H  | 0.054750  | -2.890294 | 0.285466  |

1 imaginary frequency

E = -1623.040004

E<sub>disp</sub> = -0.063573

E<sub>M06-2X</sub> = -1622.839260

### Asymmetric hetero-Diels–Alder reactions of Rawal's diene with aldehydes, catalyzed by a TADDOL derivative

#### TS – Favored isomer

Coordinates were taken from ref. 30 and not re-optimized.

E = -3352.159785

E<sub>disp</sub> = -0.226120

E<sub>M06-2X</sub> = -3351.713667

#### TS – Disfavored isomer

Coordinates were taken from ref. 30 and not re-optimized.

E = -3352.157364

E<sub>disp</sub> = -0.221290

E<sub>M06-2X</sub> = -3351.708901

### Enantioselective acyl transfer catalyzed by DHIPs

#### TS – Favored isomer

B3LYP coordinates and energy are available from ref. 32.

E<sub>disp</sub> = -0.085677

E<sub>M06-2X</sub> = -1716.785364

#### TS – Disfavored isomer

B3LYP coordinates and energy are available from ref. 32.

E<sub>disp</sub> = -0.079190

E<sub>M06-2X</sub> = -1716.778748

**Diastereoselective Diels–Alder reactions of anthracene with aryl-substituted maleic anhydride derivatives – R = Me**

**TS – Favored isomer**

|   |           |           |           |
|---|-----------|-----------|-----------|
| C | 2.034852  | -3.582940 | 0.696625  |
| C | 2.034852  | -3.582940 | -0.696625 |
| C | -4.256369 | -2.590830 | -0.696223 |
| C | -4.256369 | -2.590830 | 0.696223  |
| C | 1.191167  | -2.738996 | -1.429722 |
| C | 1.191167  | -2.738996 | 1.429722  |
| C | -3.151710 | -2.094117 | -1.406128 |
| C | -3.151710 | -2.094117 | 1.406128  |
| C | -2.058568 | -1.607164 | -0.704207 |
| C | -2.058568 | -1.607164 | 0.704207  |
| C | 0.345220  | -1.892167 | -0.702711 |
| C | 0.345220  | -1.892167 | 0.702711  |
| H | 2.698333  | -4.260381 | 1.229583  |
| H | 2.698333  | -4.260381 | -1.229583 |
| H | -5.117865 | -2.969416 | -1.239474 |
| H | -5.117865 | -2.969416 | 1.239474  |
| C | 1.189579  | -2.775709 | -2.940400 |
| H | 0.219510  | -3.094731 | -3.342383 |
| H | 1.408869  | -1.791972 | -3.374171 |
| H | 1.943890  | -3.475932 | -3.312548 |
| C | 1.189579  | -2.775709 | 2.940400  |
| H | 0.219510  | -3.094731 | 3.342383  |
| H | 1.408869  | -1.791972 | 3.374171  |
| H | 1.943890  | -3.475932 | 3.312548  |
| H | -3.156778 | -2.084620 | -2.493217 |
| H | -3.156778 | -2.084620 | 2.493217  |
| C | -0.760457 | -1.025170 | -1.303597 |
| C | -0.760457 | -1.025170 | 1.303597  |
| C | -0.710350 | 0.386667  | -0.705535 |
| C | -0.710350 | 0.386667  | 0.705535  |
| C | -1.705081 | 1.399098  | -1.139914 |
| C | -1.705081 | 1.399098  | 1.139914  |
| O | -2.179453 | 2.056602  | 0.000000  |
| O | -2.113141 | 1.667169  | -2.238637 |
| O | -2.113141 | 1.667169  | 2.238637  |
| H | -0.775095 | -1.019211 | -2.393815 |
| H | -0.775095 | -1.019211 | 2.393815  |
| C | 4.125079  | -0.490862 | 0.705167  |
| C | 4.125079  | -0.490862 | -0.705167 |
| C | 2.143266  | 0.901165  | 0.711764  |
| C | 2.143266  | 0.901165  | -0.711764 |
| C | 3.134622  | 0.173712  | -1.404365 |
| C | 3.134622  | 0.173712  | 1.404365  |
| C | 1.117560  | 1.667735  | -1.360512 |
| C | 1.117560  | 1.667735  | 1.360512  |
| C | -0.234179 | 5.116017  | -0.705211 |
| C | -0.234179 | 5.116017  | 0.705211  |
| C | 0.685189  | 2.876056  | -0.712171 |
| C | 0.685189  | 2.876056  | 0.712171  |
| C | 0.197930  | 4.005625  | -1.406360 |
| C | 0.197930  | 4.005625  | 1.406360  |
| H | 4.907877  | -1.018238 | 1.242974  |
| H | 4.907877  | -1.018238 | -1.242974 |
| H | 3.133663  | 0.175911  | -2.491620 |
| H | 3.133663  | 0.175911  | 2.491620  |
| H | 1.043066  | 1.619780  | -2.444974 |
| H | 1.043066  | 1.619780  | 2.444974  |
| H | -0.586333 | 5.991756  | -1.242846 |

|   |           |          |           |
|---|-----------|----------|-----------|
| H | -0.586333 | 5.991756 | 1.242846  |
| H | 0.177299  | 3.994590 | 2.492458  |
| H | 0.177299  | 3.994590 | -2.492458 |

l imaginary frequency  
E = -1535.719926  
E<sub>disp</sub> = -0.090892  
E<sub>M06-2X</sub> = -1535.513816

**TS – Disfavored isomer**

|   |           |           |           |
|---|-----------|-----------|-----------|
| C | -3.909679 | 1.861523  | 0.697435  |
| C | -3.909679 | 1.861523  | -0.697435 |
| C | 1.993255  | 4.307365  | -0.695711 |
| C | 1.993255  | 4.307365  | 0.695711  |
| C | -2.732993 | 1.584219  | -1.402915 |
| C | -2.732993 | 1.584219  | 1.402915  |
| C | 1.316599  | 3.321299  | -1.433536 |
| C | 1.316599  | 3.321299  | 1.433536  |
| C | 0.629619  | 2.348790  | -0.703823 |
| C | 0.629619  | 2.348790  | 0.703823  |
| C | -1.562495 | 1.313415  | -0.702779 |
| C | -1.562495 | 1.313415  | 0.702779  |
| H | -4.823786 | 2.086342  | 1.240549  |
| H | -4.823786 | 2.086342  | -1.240549 |
| H | 2.541515  | 5.080569  | -1.228900 |
| H | 2.541515  | 5.080569  | 1.228900  |
| C | 1.361649  | 3.311844  | -2.944186 |
| H | 1.972889  | 4.137901  | -3.320061 |
| H | 1.792569  | 2.376952  | -3.322660 |
| H | 0.361702  | 3.414248  | -3.384845 |
| C | 1.361649  | 3.311844  | 2.944186  |
| H | 1.972889  | 4.137901  | 3.320061  |
| H | 1.792569  | 2.376952  | 3.322660  |
| H | 0.361702  | 3.414248  | 3.384845  |
| H | -2.729315 | 1.598887  | -2.490434 |
| H | -2.729315 | 1.598887  | 2.490434  |
| C | -0.172225 | 1.165690  | -1.303764 |
| C | -0.172225 | 1.165690  | 1.303764  |
| C | 0.538256  | -0.055021 | -0.705508 |
| C | 0.538256  | -0.055021 | 0.705508  |
| C | 1.920757  | -0.372526 | -1.138442 |
| C | 1.920757  | -0.372526 | 1.138442  |
| O | 2.672138  | -0.681452 | 0.000000  |
| O | 2.413594  | -0.365624 | -2.236132 |
| O | 2.413594  | -0.365624 | 2.236132  |
| H | -0.173759 | 1.163376  | -2.394134 |
| H | -0.173759 | 1.163376  | 2.394134  |
| C | -4.017777 | -1.888277 | 0.705329  |
| C | -4.017777 | -1.888277 | -0.705329 |
| C | -1.600023 | -2.017302 | 0.711894  |
| C | -1.600023 | -2.017302 | -0.711894 |
| C | -2.826142 | -1.924543 | -1.404736 |
| C | -2.826142 | -1.924543 | 1.404736  |
| C | -0.324094 | -2.120380 | -1.360861 |
| C | -0.324094 | -2.120380 | 1.360861  |
| C | 2.660354  | -4.313469 | -0.705304 |
| C | 2.660354  | -4.313469 | 0.705304  |
| C | 0.687956  | -2.908575 | -0.712269 |
| C | 0.687956  | -2.908575 | 0.712269  |
| C | 1.702726  | -3.604423 | -1.406295 |
| C | 1.702726  | -3.604423 | 1.406295  |
| H | -4.961284 | -1.855171 | 1.242854  |
| H | -4.961284 | -1.855171 | -1.242854 |

|   |           |           |           |
|---|-----------|-----------|-----------|
| H | -2.823443 | -1.918351 | -2.491852 |
| H | -2.823443 | -1.918351 | 2.491852  |
| H | -0.286837 | -2.038649 | -2.445194 |
| H | -0.286837 | -2.038649 | 2.445194  |
| H | 3.424796  | -4.867064 | -1.243033 |
| H | 3.424796  | -4.867064 | 1.243033  |
| H | 1.713188  | -3.586005 | 2.492493  |
| H | 1.713188  | -3.586005 | -2.492493 |

l imaginary frequency

E = -1535.721576

E<sub>disp</sub> = -0.089695

E<sub>M06-2X</sub> = -1535.513799

### Diastereoselective Diels–Alder reactions of anthracene with aryl-substituted maleic anhydride derivatives – R = OMe

#### TS – Favored isomer

|   |           |           |           |
|---|-----------|-----------|-----------|
| C | 1.133359  | -3.704773 | 0.700763  |
| C | 1.133359  | -3.704773 | -0.700763 |
| C | -4.786001 | -1.391916 | -0.696250 |
| C | -4.786001 | -1.391916 | 0.696250  |
| C | 0.508897  | -2.678339 | -1.411761 |
| C | 0.508897  | -2.678339 | 1.411761  |
| C | -3.601649 | -1.138781 | -1.406487 |
| C | -3.601649 | -1.138781 | 1.406487  |
| C | -2.431148 | -0.891186 | -0.704513 |
| C | -2.431148 | -0.891186 | 0.704513  |
| C | -0.143059 | -1.664549 | -0.697042 |
| C | -0.143059 | -1.664549 | 0.697042  |
| H | 1.629527  | -4.517087 | 1.219366  |
| H | 1.629527  | -4.517087 | -1.219366 |
| H | -5.707784 | -1.581948 | -1.239415 |
| H | -5.707784 | -1.581948 | 1.239415  |
| O | 0.466802  | -2.582417 | -2.779509 |
| O | 0.466802  | -2.582417 | 2.779509  |
| C | 1.059855  | -3.622038 | -3.537436 |
| H | 0.900166  | -3.359890 | -4.585201 |
| H | 2.138610  | -3.699135 | -3.344223 |
| H | 0.589065  | -4.592792 | -3.331126 |
| C | 1.059855  | -3.622038 | 3.537436  |
| H | 0.900166  | -3.359890 | 4.585201  |
| H | 2.138610  | -3.699135 | 3.344223  |
| H | 0.589065  | -4.592792 | 3.331126  |
| H | -3.602594 | -1.131704 | -2.493461 |
| H | -3.602594 | -1.131704 | 2.493461  |
| C | -1.040310 | -0.594699 | -1.307618 |
| C | -1.040310 | -0.594699 | 1.307618  |
| C | -0.694055 | 0.773535  | -0.705396 |
| C | -0.694055 | 0.773535  | 0.705396  |
| C | -1.439131 | 1.980801  | -1.140435 |
| C | -1.439131 | 1.980801  | 1.140435  |
| O | -1.757136 | 2.726235  | 0.000000  |
| O | -1.776088 | 2.335152  | -2.238828 |
| O | -1.776088 | 2.335152  | 2.238828  |
| H | -1.041105 | -0.602692 | -2.396716 |
| H | -1.041105 | -0.602692 | 2.396716  |
| C | 3.822723  | -1.159551 | 0.705464  |
| C | 3.822723  | -1.159551 | -0.705464 |
| C | 2.202508  | 0.638551  | 0.711830  |
| C | 2.202508  | 0.638551  | -0.711830 |
| C | 3.003019  | -0.294241 | -1.405784 |
| C | 3.003019  | -0.294241 | 1.405784  |

|   |          |           |           |
|---|----------|-----------|-----------|
| C | 1.376439 | 1.615784  | -1.360998 |
| C | 1.376439 | 1.615784  | 1.360998  |
| C | 0.831382 | 5.278796  | -0.705343 |
| C | 0.831382 | 5.278796  | 0.705343  |
| C | 1.224993 | 2.889577  | -0.712325 |
| C | 1.224993 | 2.889577  | 0.712325  |
| C | 1.002776 | 4.099764  | -1.406389 |
| C | 1.002776 | 4.099764  | 1.406389  |
| H | 4.469816 | -1.847933 | 1.242183  |
| H | 4.469816 | -1.847933 | -1.242183 |
| H | 2.990535 | -0.300422 | -2.492536 |
| H | 2.990535 | -0.300422 | 2.492536  |
| H | 1.289738 | 1.582217  | -2.444883 |
| H | 1.289738 | 1.582217  | 2.444883  |
| H | 0.684266 | 6.211235  | -1.242922 |
| H | 0.684266 | 6.211235  | 1.242922  |
| H | 0.979020 | 4.092909  | 2.492437  |
| H | 0.979020 | 4.092909  | -2.492437 |

l imaginary frequency

E = -1686.129616

E<sub>disp</sub> = -0.093207

E<sub>M06-2X</sub> = -1685.925391

### TS – Disfavored isomer

|   |           |           |           |
|---|-----------|-----------|-----------|
| C | -4.257600 | 0.719629  | 0.697330  |
| C | -4.257600 | 0.719629  | -0.697330 |
| C | 0.958679  | 4.382690  | -0.699235 |
| C | 0.958679  | 4.382690  | 0.699235  |
| C | -3.048863 | 0.698598  | -1.403317 |
| C | -3.048863 | 0.698598  | 1.403317  |
| C | 0.507497  | 3.266577  | -1.416482 |
| C | 0.507497  | 3.266577  | 1.416482  |
| C | 0.067934  | 2.150691  | -0.698427 |
| C | 0.067934  | 2.150691  | 0.698427  |
| C | -1.847847 | 0.681249  | -0.703434 |
| C | -1.847847 | 0.681249  | 0.703434  |
| H | -5.198647 | 0.746104  | 1.240491  |
| H | -5.198647 | 0.746104  | -1.240491 |
| H | 1.317419  | 5.264366  | -1.218101 |
| H | 1.317419  | 5.264366  | 1.218101  |
| O | 0.457874  | 3.178131  | -2.781155 |
| O | 0.457874  | 3.178131  | 2.781155  |
| C | 0.990138  | 4.251035  | -3.539125 |
| H | 0.432360  | 5.182419  | -3.370485 |
| H | 2.050635  | 4.418649  | -3.309358 |
| H | 0.890471  | 3.957079  | -4.585636 |
| C | 0.990138  | 4.251035  | 3.539125  |
| H | 0.432360  | 5.182419  | 3.370485  |
| H | 2.050635  | 4.418649  | 3.309358  |
| H | 0.890471  | 3.957079  | 4.585636  |
| H | -3.047388 | 0.716440  | -2.490617 |
| H | -3.047388 | 0.716440  | 2.490617  |
| C | -0.457038 | 0.831239  | -1.307500 |
| C | -0.457038 | 0.831239  | 1.307500  |
| C | 0.488891  | -0.217510 | -0.705938 |
| C | 0.488891  | -0.217510 | 0.705938  |
| C | 1.907555  | -0.261693 | -1.140936 |
| C | 1.907555  | -0.261693 | 1.140936  |
| O | 2.704899  | -0.403197 | 0.000000  |
| O | 2.390592  | -0.181154 | -2.238931 |
| O | 2.390592  | -0.181154 | 2.238931  |
| H | -0.448316 | 0.848996  | -2.396770 |



|   |           |           |           |
|---|-----------|-----------|-----------|
| H | -0.448316 | 0.848996  | 2.396770  |
| C | -3.601145 | -2.962379 | 0.705303  |
| C | -3.601145 | -2.962379 | -0.705303 |
| C | -1.210846 | -2.576317 | 0.711803  |
| C | -1.210846 | -2.576317 | -0.711803 |
| C | -2.428900 | -2.744130 | -1.404562 |
| C | -2.428900 | -2.744130 | 1.404562  |
| C | 0.059220  | -2.411506 | -1.360269 |
| C | 0.059220  | -2.411506 | 1.360269  |
| C | 3.425358  | -3.957558 | -0.705191 |
| C | 3.425358  | -3.957558 | 0.705191  |
| C | 1.209381  | -2.981591 | -0.712240 |
| C | 1.209381  | -2.981591 | 0.712240  |
| C | 2.343820  | -3.457415 | -1.406345 |
| C | 2.343820  | -3.457415 | 1.406345  |
| H | -4.530215 | -3.129719 | 1.243023  |
| H | -4.530215 | -3.129719 | -1.243023 |
| H | -2.427418 | -2.736177 | -2.491667 |
| H | -2.427418 | -2.736177 | 2.491667  |
| H | 0.078800  | -2.322463 | -2.444474 |
| H | 0.078800  | -2.322463 | 2.444474  |
| H | 4.286562  | -4.343996 | -1.242877 |
| H | 4.286562  | -4.343996 | 1.242877  |
| H | 2.351001  | -3.434377 | 2.492413  |
| H | 2.351001  | -3.434377 | -2.492413 |

1 imaginary frequency

E = -1686.127509

E<sub>disp</sub> = -0.091310

E<sub>M06-2X</sub> = -1685.921358

## Diastereoselective Diels–Alder reactions of anthracene with aryl-substituted maleic anhydride derivatives – R = Br

### TS – Favored isomer

|    |           |           |           |
|----|-----------|-----------|-----------|
| C  | 1.002588  | -3.467126 | 0.695421  |
| C  | 1.002588  | -3.467126 | -0.695421 |
| C  | -4.879237 | -0.976832 | -0.696480 |
| C  | -4.879237 | -0.976832 | 0.696480  |
| C  | 0.391188  | -2.418787 | -1.386098 |
| C  | 0.391188  | -2.418787 | 1.386098  |
| C  | -3.688545 | -0.762057 | -1.407610 |
| C  | -3.688545 | -0.762057 | 1.407610  |
| C  | -2.512021 | -0.548343 | -0.704033 |
| C  | -2.512021 | -0.548343 | 0.704033  |
| C  | -0.253177 | -1.393632 | -0.705349 |
| C  | -0.253177 | -1.393632 | 0.705349  |
| H  | 1.484185  | -4.269631 | 1.242844  |
| H  | 1.484185  | -4.269631 | -1.242844 |
| H  | -5.806446 | -1.138544 | -1.239143 |
| H  | -5.806446 | -1.138544 | 1.239143  |
| Br | 0.487447  | -2.410453 | -3.296312 |
| Br | 0.487447  | -2.410453 | 3.296312  |
| H  | -3.688990 | -0.757433 | -2.494356 |
| H  | -3.688990 | -0.757433 | 2.494356  |
| C  | -1.114480 | -0.290613 | -1.306291 |
| C  | -1.114480 | -0.290613 | 1.306291  |
| C  | -0.714731 | 1.061632  | -0.705139 |
| C  | -0.714731 | 1.061632  | 0.705139  |
| C  | -1.419022 | 2.292895  | -1.140585 |
| C  | -1.419022 | 2.292895  | 1.140585  |
| O  | -1.707712 | 3.049474  | 0.000000  |
| O  | -1.745698 | 2.655183  | -2.239005 |

|   |           |           |           |
|---|-----------|-----------|-----------|
| O | -1.745698 | 2.655183  | 2.239005  |
| H | -1.114728 | -0.297747 | -2.395595 |
| H | -1.114728 | -0.297747 | 2.395595  |
| C | 3.716673  | -1.057568 | 0.705511  |
| C | 3.716673  | -1.057568 | -0.705511 |
| C | 2.173575  | 0.805637  | 0.712056  |
| C | 2.173575  | 0.805637  | -0.712056 |
| C | 2.930851  | -0.161967 | -1.407390 |
| C | 2.930851  | -0.161967 | 1.407390  |
| C | 1.387258  | 1.816152  | -1.361089 |
| C | 1.387258  | 1.816152  | 1.361089  |
| C | 0.981227  | 5.496621  | -0.705315 |
| C | 0.981227  | 5.496621  | 0.705315  |
| C | 1.284414  | 3.094753  | -0.712249 |
| C | 1.284414  | 3.094753  | 0.712249  |
| C | 1.108057  | 4.312076  | -1.406706 |
| C | 1.108057  | 4.312076  | 1.406706  |
| H | 4.332053  | -1.773820 | 1.242793  |
| H | 4.332053  | -1.773820 | -1.242793 |
| H | 2.906211  | -0.180557 | -2.493461 |
| H | 2.906211  | -0.180557 | 2.493461  |
| H | 1.300238  | 1.786612  | -2.445118 |
| H | 1.300238  | 1.786612  | 2.445118  |
| H | 0.870079  | 6.434010  | -1.242758 |
| H | 0.870079  | 6.434010  | 1.242758  |
| H | 1.085454  | 4.306575  | 2.492746  |
| H | 1.085454  | 4.306575  | -2.492746 |

1 imaginary frequency

E = -6599.299151

E<sub>disp</sub> = -0.093439

E<sub>M06-2X</sub> = -6604.047904

### TS – Disfavored isomer

|    |           |           |           |
|----|-----------|-----------|-----------|
| C  | 4.295975  | -0.336155 | 0.697546  |
| C  | 4.295975  | -0.336155 | -0.697546 |
| C  | -0.861447 | -4.069663 | -0.694298 |
| C  | -0.861447 | -4.069663 | 0.694298  |
| C  | 3.088165  | -0.324643 | -1.404388 |
| C  | 3.088165  | -0.324643 | 1.404388  |
| C  | -0.431412 | -2.933161 | -1.392117 |
| C  | -0.431412 | -2.933161 | 1.392117  |
| C  | -0.008341 | -1.804897 | -0.706822 |
| C  | -0.008341 | -1.804897 | 0.706822  |
| C  | 1.887794  | -0.313476 | -0.702724 |
| C  | 1.887794  | -0.313476 | 0.702724  |
| H  | 5.237209  | -0.357103 | 1.240198  |
| H  | 5.237209  | -0.357103 | -1.240198 |
| H  | -1.196624 | -4.944179 | -1.240705 |
| H  | -1.196624 | -4.944179 | 1.240705  |
| H  | 3.086824  | -0.345285 | -2.491390 |
| H  | 3.086824  | -0.345285 | 2.491390  |
| Br | -0.446172 | -2.977574 | -3.302641 |
| Br | -0.446172 | -2.977574 | 3.302641  |
| C  | 0.498401  | -0.473757 | -1.305592 |
| C  | 0.498401  | -0.473757 | 1.305592  |
| C  | -0.464083 | 0.558708  | -0.705573 |
| C  | -0.464083 | 0.558708  | 0.705573  |
| C  | -1.883955 | 0.575350  | -1.141059 |
| C  | -1.883955 | 0.575350  | 1.141059  |
| O  | -2.682760 | 0.705162  | 0.000000  |
| O  | -2.362088 | 0.480675  | -2.239282 |
| O  | -2.362088 | 0.480675  | 2.239282  |

|   |           |           |           |
|---|-----------|-----------|-----------|
| H | 0.491782  | -0.490192 | -2.395102 |
| H | 0.491782  | -0.490192 | 2.395102  |
| C | 3.591697  | 3.343875  | 0.705346  |
| C | 3.591697  | 3.343875  | -0.705346 |
| C | 1.205848  | 2.933348  | 0.711796  |
| C | 1.205848  | 2.933348  | -0.711796 |
| C | 2.421918  | 3.113651  | -1.404954 |
| C | 2.421918  | 3.113651  | 1.404954  |
| C | -0.062183 | 2.754646  | -1.360643 |
| C | -0.062183 | 2.754646  | 1.360643  |
| C | -3.452095 | 4.245584  | -0.705230 |
| C | -3.452095 | 4.245584  | 0.705230  |
| C | -1.220962 | 3.306208  | -0.712270 |
| C | -1.220962 | 3.306208  | 0.712270  |
| C | -2.362813 | 3.763230  | -1.406824 |
| C | -2.362813 | 3.763230  | 1.406824  |
| H | 4.518813  | 3.521896  | 1.242872  |
| H | 4.518813  | 3.521896  | -1.242872 |
| H | 2.420552  | 3.106738  | -2.492020 |
| H | 2.420552  | 3.106738  | 2.492020  |
| H | -0.080621 | 2.665423  | -2.444878 |
| H | -0.080621 | 2.665423  | 2.444878  |
| H | -4.319470 | 4.618012  | -1.242659 |
| H | -4.319470 | 4.618012  | 1.242659  |
| H | -2.369743 | 3.740623  | 2.492847  |
| H | -2.369743 | 3.740623  | -2.492847 |

1 imaginary frequency

E = -6599.293837

E<sub>disp</sub> = -0.089938

E<sub>M06-2X</sub> = -6604.041700

## Enantioselective Claisen rearrangements catalyzed by chiral guanidinium salts

### TS – Favored isomer

B3LYP coordinates and energy are available from ref. 36.

E<sub>disp</sub> = -0.146417

E<sub>M06-2X</sub> = -2131.883994

### TS – Disfavored isomer

B3LYP coordinates and energy are available from ref. 36.

E<sub>disp</sub> = -0.147797

E<sub>M06-2X</sub> = -2131.879479

## Citation for Gaussian 09

M. J. Frisch, G. W. Trucks, H. B. Schlegel, G. E. Scuseria, M. A. Robb, J. R. Cheeseman, G. Scalmani, V. Barone, B. Mennucci, G. A. Petersson, H. Nakatsuji, M. Caricato, X. Li, H. P. Hratchian, A. F. Izmaylov, J. Bloino, G. Zheng, J. L. Sonnenberg, M. Hada, M. Ehara, K. Toyota, R. Fukuda, J. Hasegawa, M. Ishida, T. Nakajima, Y. Honda, O. Kitao, H. Nakai, T. Vreven, J. A. Montgomery, Jr., J. E. Peralta, F. Ogliaro, M. Bearpark, J. J. Heyd, E. Brothers, K. N. Kudin, V. N. Staroverov, T. Keith, R. Kobayashi, J. Normand, K. Raghavachari, A. Rendell, J. C. Burant, S. S. Iyengar, J. Tomasi, M. Cossi, N. Rega, J. M. Millam, M. Klene, J. E. Knox, J. B. Cross, V. Bakken, C. Adamo, J. Jaramillo, R. Gomperts, R. E. Stratmann, O. Yazyev, A. J. Austin, R. Cammi, C. Pomelli, J. W. Ochterski, R. L. Martin, K. Morokuma, V. G. Zakrzewski, G. A. Voth, P. Salvador, J. J. Dannenberg, S. Dapprich, A. D. Daniels, O. Farkas, J. B. Foresman, J. V. Ortiz, J. Cioslowski, and D. J. Fox, Gaussian 09, Revision C.01, Gaussian, Inc., Wallingford CT, 2010.
